# Supplementary material
Source: Elsevier journal article supplement (https://comptes-rendus.academie-sciences.fr/chimie/article/10.1016/j.crci.2011.03.002/file/attach/mmc2.pdf)

# checkCIF/PLATON report

No syntax errors found. CIF dictionary Interpreting this report

## Datablock: tm10

---

Bond precision: C-C = 0.0047 Å Wavelength=0.71073

Cell: a=10.6287(2) b=17.3801(5) c=10.9153(3)  
alpha=90 beta=113.0391(11) gamma=90

Temperature: 293 K

|                | Calculated     | Reported          |
|----------------|----------------|-------------------|
| Volume         | 1855.53(8)     | 1855.53(8)        |
| Space group    | P 21/n         | P21/n             |
| Hall group     | -P 2yn         | -P 2yn            |
| Moiety formula | C22 H20 Br N O | C22 H20 Br1 N1 O1 |
| Sum formula    | C22 H20 Br N O | C22 H20 Br N O    |
| Mr             | 394.29         | 394.30            |
| Dx,g cm-3      | 1.411          | 1.411             |
| Z              | 4              | 4                 |
| Mu (mm-1)      | 2.224          | 2.224             |
| F000           | 808.0          | 808.0             |
| F000'          | 807.13         |                   |
| h,k,lmax       | 13,22,14       | 13,22,14          |
| Nref           | 4259           | 4186              |
| Tmin,Tmax      | 0.766,0.935    | 0.757,0.831       |
| Tmin'          | 0.641          |                   |

Correction method= MULTI-SCAN

Data completeness= 0.983 Theta(max)= 27.480

R(reflections)= 0.0479( 2497) wR2(reflections)= 0.1090( 4186)

S = 1.023 Npar= 254

---

The following ALERTS were generated. Each ALERT has the format

**test-name\_ALERT\_alert-type\_alert-level.**

Click on the hyperlinks for more details of the test.

---

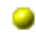

### Alert level C

PLAT222\_ALERT\_3\_C Large Non-Solvent H Uiso(max)/Uiso(min) ... 4.64 Ratio  
PLAT245\_ALERT\_2\_C U(iso) H2A Smaller than U(eq) C2 by ... 0.01 AngSq  
PLAT391\_ALERT\_3\_C Deviating Methyl C22 H-C-H Bond Angle ..... 101.00 Deg.

---

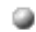

### Alert level G

|                   |                                                  |               |       |
|-------------------|--------------------------------------------------|---------------|-------|
| PLAT128_ALERT_4_G | Alternate Setting of Space-group P21/c           | .....         | P21/n |
| PLAT164_ALERT_4_G | Nr. of Refined C-H H-Atoms in Heavy-Atom Struct. |               | 6     |
| PLAT199_ALERT_1_G | Check the Reported _cell_measurement_temperature |               | 293 K |
| PLAT200_ALERT_1_G | Check the Reported _diffrn_ambient_temperature   |               | 293 K |
| PLAT793_ALERT_4_G | The Model has Chirality at C3                    | (Verify) .... | R     |

---

0 **ALERT level A** = In general: serious problem  
0 **ALERT level B** = Potentially serious problem  
3 **ALERT level C** = Check and explain  
5 **ALERT level G** = General alerts; check

2 ALERT type 1 CIF construction/syntax error, inconsistent or missing data  
1 ALERT type 2 Indicator that the structure model may be wrong or deficient  
2 ALERT type 3 Indicator that the structure quality may be low  
3 ALERT type 4 Improvement, methodology, query or suggestion  
0 ALERT type 5 Informative message, check

---

### Publication of your CIF in IUCr journals

**A basic structural check has been run on your CIF. These basic checks will be run on all CIFs submitted for publication in IUCr journals (*Acta Crystallographica*, *Journal of Applied Crystallography*, *Journal of Synchrotron Radiation*); however, if you intend to submit to *Acta Crystallographica Section C* or *E*, you should make sure that full publication checks are run on the final version of your CIF prior to submission.**

### Publication of your CIF in other journals

**Please refer to the *Notes for Authors* of the relevant journal for any special instructions relating to CIF submission.**

---

**PLATON version of 22/10/2010; check.def file version of 11/10/2010**

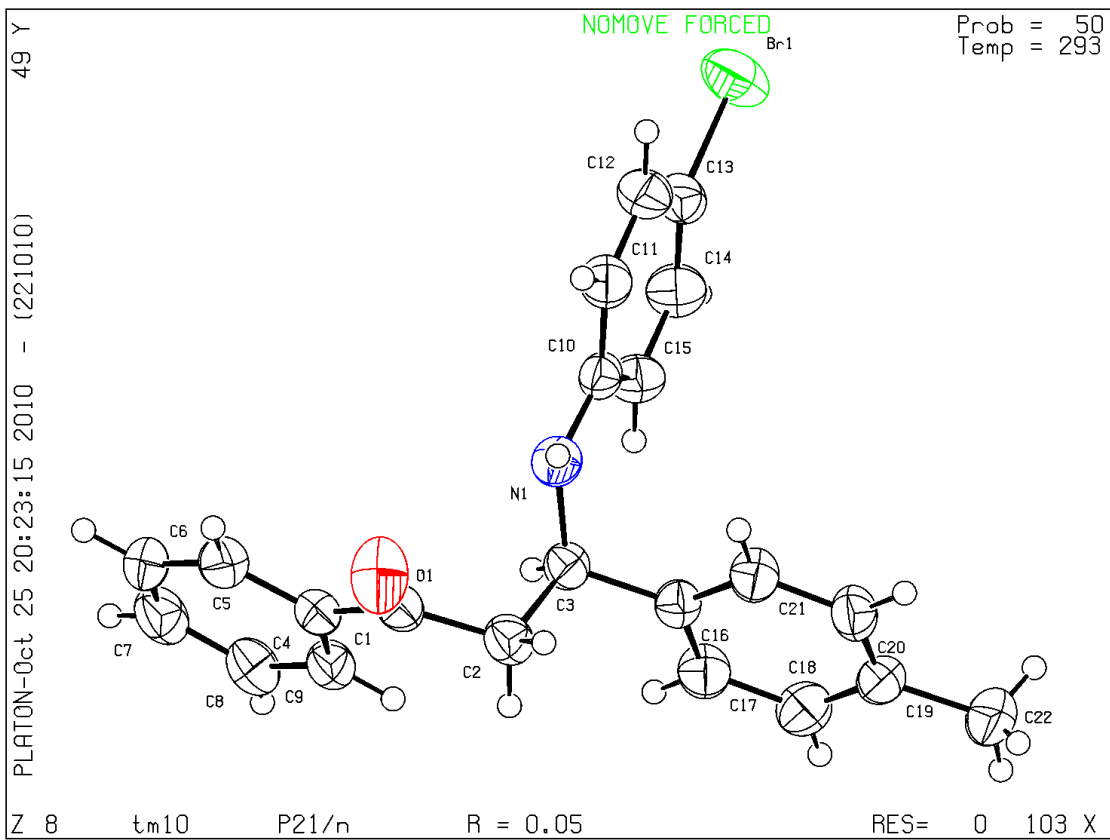

Supplement: mmc2 [file mmc2.pdf]
